# Supplementary material
Source: publisher figshare collection journal article supplement (https://acs.figshare.com/ndownloader/files/5520545)
Supplement: Supplementary file 1 [file 5520545]

## Supporting Information

### **Hierarchical $\text{LiMn}_2\text{O}_4$ Hollow Cubes with Exposed {111} Planes as High-Power Cathodes for Lithium-Ion Batteries**

*Yu Wu, Chuanbao Cao,\* Junting Zhang, Lin Wang, Xilan Ma and Xingyan Xu*

Research Center of Materials Science, Beijing Key Laboratory of Construction Tailorable Advanced Functional Materials and Green Applications, Beijing Institute of Technology, Beijing 100081, China

Corresponding author: Chuanbao Cao

E-mail: [cbcao@bit.edu.cn](mailto:cbcao@bit.edu.cn)

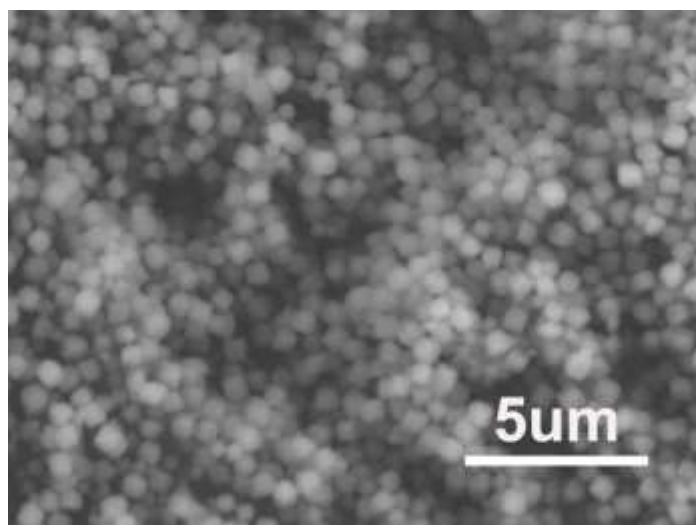

Figure S1. SEM image of  $\text{MnCO}_3$  cubes.

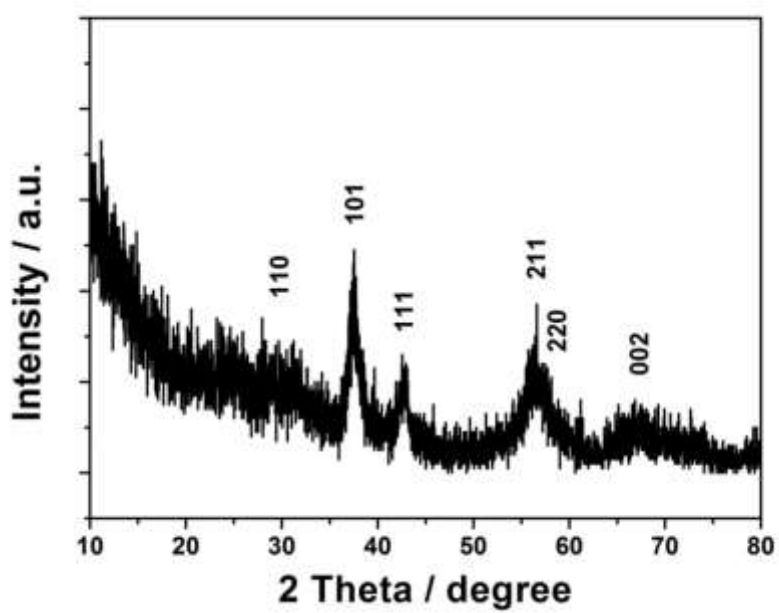

Figure S2. XRD pattern of  $\text{MnO}_2$  cubes (JCPDS Card No.: 24-0735).

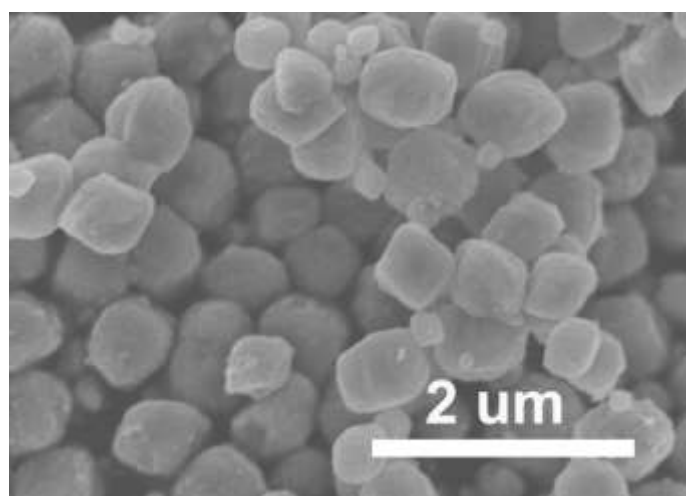

Figure S3. SEM image of MnO<sub>2</sub> cubes.

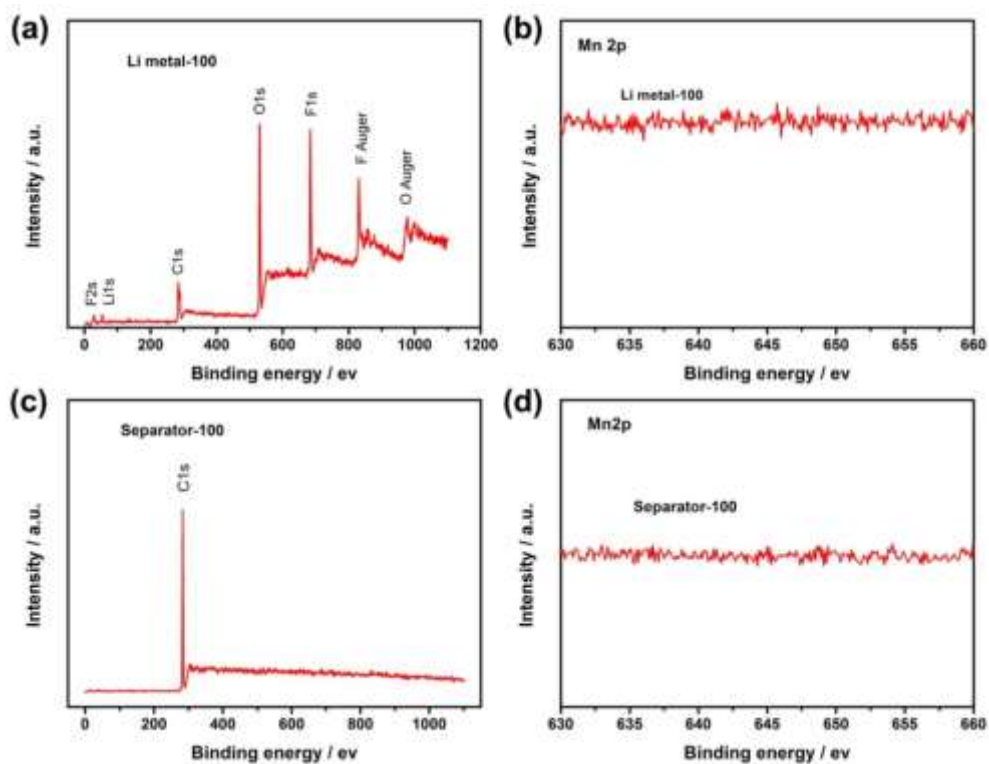

Figure S4. (a) and (c) XPS spectra of the lithium metal and separator collected after 100 cycles. (b) and (d) The Mn XPS spectra of the lithium metal and separator collected after 100 cycles.

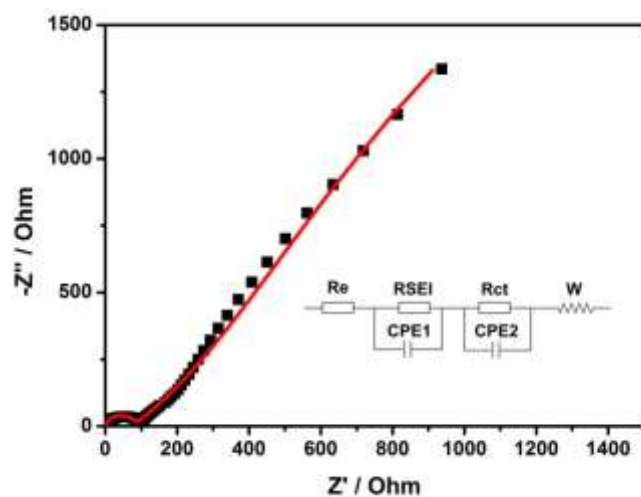

Figure S5. Nyquist plot for the as-prepared  $\text{LiMn}_2\text{O}_4$ . The symbols are the experimental data, whereas the continuous lines are the fitted data.

**Table S1. Electrochemical performances for several advanced  $\text{LiMn}_2\text{O}_4$  cathode materials**

| Structure                                              | Temperature ( $^{\circ}\text{C}$ ) | Capacity retention     | Reference |
|--------------------------------------------------------|------------------------------------|------------------------|-----------|
| Hierarchical hollow cubes                              | 25                                 | 98.4% (5C, 100 cycles) | This work |
|                                                        | 60                                 | 90.7% (5C, 100 cycles) |           |
| Porous nanorods                                        | 25                                 | 90% (1C, 100 cycles)   | 5         |
| Nanotubes                                              | 25                                 | 80% (5C, 100 cycles)   | 6         |
| Epitaxial coating with a hierarchical atomic structure | 60                                 | 82% (1C, 100 cycles)   | 9         |
| Grown with epitaxial layered nanostructure             | 60                                 | 85% (1C, 100 cycles)   | 11        |
| Epitaxial coating with lithium titanate                | 25                                 | 97.0% (1C, 100 cycles) | 14        |
|                                                        | 60                                 | 90.6% (1C, 100 cycles) |           |
| Porous microspheres                                    | 25                                 | 90.4% (1C, 100 cycles) | 32        |
| Hollow microspheres                                    | 25                                 | 96.6% (1C, 105 cycles) | 33        |
| Yolk-structured microspheres                           | 25                                 | 96% (2C, 100 cycles)   | 34        |
| Truncated octahedral                                   | 25                                 | 97.1% (1C, 60 cycles)  | 35        |
